# Supplementary material
Source: PubMed Central journal article supplement (PMC3218631)
Supplement: supp_kwr203_kwr203_Web_Tables.pdf [file supp_kwr203_kwr203_Web_Tables.pdf]

**Web Table 1:** The correlation between free protein S concentration, clinical and laboratory characteristics

|                             | Correlation with<br>free protein S<br>r | P-value |
|-----------------------------|-----------------------------------------|---------|
| Age (years)                 | -0.01                                   | 0.476   |
| BMI (kg/m <sup>2</sup> )    | 0.12                                    | <0.001  |
| SBP (mmHg)                  | 0.10                                    | <0.001  |
| DBP (mmHg)                  | 0.09                                    | <0.001  |
| Alcohol (Units/Week)        | 0.12                                    | <0.001  |
| Lipids                      |                                         |         |
| TC (mmol/L)                 | 0.21                                    | <0.001  |
| TG (mmol/L)                 | 0.18                                    | <0.001  |
| HDL-C (mmol/L)              | -0.01                                   | 0.526   |
| LDL-C (mmol/L)              | 0.10                                    | <0.001  |
| Hemostatic and inflammation |                                         |         |
| Fibrinogen (g/L)            | -0.01                                   | 0.708   |
| FVIIa (ng/mL)               | -0.05                                   | 0.227   |
| FVIIag (% standard)         | 0.06                                    | 0.005   |
| FVIIc (% standard)          | 0.08                                    | <0.001  |
| FXIIa (ng/mL)               | 0.14                                    | <0.001  |
| FXpep (pmol/L)              | -0.04                                   | 0.263   |
| FIXpep (pmol/L)             | 0.01                                    | 0.776   |
| F 1+2 (μmol/L)              | 0.01                                    | 0.643   |
| FpA (μmol/L)                | 0.05                                    | 0.005   |
| Creatinine (μmol/L)         | 0.03                                    | 0.150   |
| CRP (mg/l)                  | 0.07                                    | <0.001  |

BMI, body mass index; SBP, systolic blood pressure; DBP, diastolic blood pressures; TC; Total Cholesterol; TG, Triglyceride; HDL-C, HDL Cholesterol; LDL-C, LDL Cholesterol; FVIIa Factor VII activated; FVIIag, Factor VII antigen; FVIIc, Factor VII coagulant activity; FXIIa, Activated factor XII; FXpep, peptides released upon activation of factor X; FIXpep, Factor IX activation peptide; F 1+2, Factor 1+2; FpA, Fibrinopeptide A; CRP, C-Reactive protein.

**Web Table 2:** The association between average free protein S CHD and stroke modeled by restricted cubic spline construction

| Free Protein S (%)  | Median | Number of CHD n (%) | Unadjusted model<br>HR (95% CI), <i>P</i> -value | Adjusted model <sup>a</sup><br>HR (95% CI), <i>P</i> -value |
|---------------------|--------|---------------------|--------------------------------------------------|-------------------------------------------------------------|
| <b>CHD</b>          |        |                     |                                                  |                                                             |
| ≤ 97                | 85     | 45 (15.2%)          | 1 (Ref.)                                         | 1 (Ref.)                                                    |
| 98-106              | 102    | 39 (13.1%)          | 1.32 (0.90, 1.93), 0.154                         | 1.23 (0.83, 1.82), 0.301                                    |
| 107-113             | 110    | 68 (22.9%)          | 1.92 (1.25, 2.92), 0.003                         | 1.72 (1.08, 2.74), 0.022                                    |
| 114-123             | 120    | 72 (24.2%)          | 1.90 (1.27, 2.83), 0.002                         | 1.55 (1.00, 2.42), 0.052                                    |
| 124-194             | 138    | 73 (24.6%)          | 2.56 (1.69, 3.86), <0.001                        | 1.87 (1.18, 2.96), 0.008                                    |
| <i>P</i> -for trend |        | <0.001              | --                                               | --                                                          |
| <b>Stroke</b>       |        |                     |                                                  |                                                             |
| ≤ 97                | 85     | 16 (16.7%)          | 1 (Ref.)                                         | 1 (Ref.)                                                    |
| 98-106              | 102    | 22 (20.8%)          | 1.54 (0.70, 3.36), 0.281                         | 1.14 (0.50, 2.56), 0.753                                    |
| 107-113             | 110    | 23 (22.9%)          | 1.17 (0.53, 2.59), 0.698                         | 0.82 (0.35, 1.91), 0.647                                    |
| 114-123             | 120    | 19 (18.8%)          | 1.45 (0.68, 3.10), 0.337                         | 0.94 (0.41, 2.13), 0.883                                    |
| 124-194             | 138    | 16 (20.8%)          | 1.52 (0.66, 3.51), 0.326                         | 0.85 (0.34, 2.15), 0.730                                    |
| <i>P</i> -for trend |        | 0.628               | --                                               | --                                                          |

Average free protein S, average of 6 annual measures during the study; HR, hazard ratio; CI, confidence interval 95%; Ref., reference group.

Free protein S was modeled by restricted cubic splines with 5 knots (85; 102; 110; 120; 138) at percentiles 5%, 27%, 50%, 73% and 95% in a Cox proportional hazards model. The value of 85 % standard was used as referent for the estimation of all hazard ratios.

<sup>a</sup> Adjusted model for age, clinic, BMI, diabetes, smoking, HDL-C, total cholesterol, systolic blood pressure and lipid/blood pressure lowering medications.
